# Supplementary material for: Effect of one-week administration of dipeptidyl peptidase-IV inhibitory peptides from chum salmon milt on postprandial blood glucose level: a randomised, placebo-controlled, double-blind, crossover, pilot clinical trial
Source: Royal Society of Chemistry journal article supplement (doi:10.1039/d1fo00592h), 2021-01-01
Supplement: d1fo00592h1.pdf [file d1fo00592h1.pdf]

1 Supplementary Table 1. Blood insulin levels obtained during the OGTT before and after supplementation with SMP or placebo

|                 |         | Placebo (n = 14) |         | SMP (n = 14) |         | Carryover effect | <i>p</i> value |                  |
|-----------------|---------|------------------|---------|--------------|---------|------------------|----------------|------------------|
|                 |         |                  |         |              |         |                  | Period effect  | Treatment effect |
| Insulin (μU/mL) | 0 min   | 5.09             | ± 2.06  | 5.13         | ± 3.08  | 0.689            | 0.774          | 0.943            |
|                 | 30 min  | 31.96            | ± 10.03 | 33.49        | ± 20.81 | 0.406            | 0.591          | 0.768            |
|                 | 60 min  | 52.37            | ± 16.01 | 52.64        | ± 25.87 | 0.933            | 0.630          | 0.968            |
|                 | 90 min  | 59.30            | ± 22.35 | 57.04        | ± 30.54 | 0.465            | 0.774          | 0.774            |
|                 | 120 min | 51.16            | ± 24.26 | 55.98        | ± 33.02 | 0.295            | 0.489          | 0.484            |

2

3

4

1 Supplementary Table 2. Vital sign and blood parameters

| Item                            | Placebo (n = 14) |         | SMP (n = 14) |         | Carryover effect | <i>p</i> value* |                  |
|---------------------------------|------------------|---------|--------------|---------|------------------|-----------------|------------------|
|                                 |                  |         |              |         |                  | Period effect   | Treatment effect |
| Systolic blood pressure (mmHg)  | 132.36           | ± 18.14 | 134.79       | ± 16.35 | 0.543            | 0.531           | 0.339            |
| Diastolic blood pressure (mmHg) | 85.07            | ± 12.67 | 84.71        | ± 13.18 | 0.323            | 0.626           | 0.824            |
| Pulse rate (times/min)          | 70.07            | ± 13.06 | 70.64        | ± 10.86 | 0.948            | 0.023           | 0.697            |
| WBC (×10 <sup>3</sup> /μL)      | 5.24             | ± 1.29  | 5.14         | ± 1.29  | 0.458            | 0.835           | 0.458            |
| RBC (×10 <sup>3</sup> /μL)      | 472.43           | ± 53.67 | 471.71       | ± 53.97 | 0.178            | 0.898           | 0.873            |
| Hb (g/dL)                       | 14.40            | ± 1.87  | 14.42        | ± 1.90  | 0.141            | 0.956           | 0.877            |
| Ht (%)                          | 44.14            | ± 5.16  | 44.01        | ± 4.95  | 0.103            | 0.642           | 0.743            |
| Plt (×10 <sup>3</sup> /μL)      | 23.76            | ± 4.87  | 22.69        | ± 4.68  | 0.514            | 0.085           | 0.119            |
| AST (U/L)                       | 24.50            | ± 8.72  | 25.43        | ± 9.95  | 0.379            | 0.767           | 0.584            |
| ALT (U/L)                       | 25.86            | ± 16.70 | 28.07        | ± 17.34 | 0.548            | 0.577           | 0.259            |
| γ-GTP (U/L)                     | 35.71            | ± 24.92 | 34.21        | ± 20.48 | 0.516            | 0.529           | 0.487            |
| ALP (U/L)                       | 210.86           | ± 62.76 | 206.14       | ± 62.05 | 0.929            | 0.751           | 0.100            |
| LDH (U/L)                       | 205.86           | ± 27.41 | 206.29       | ± 24.86 | 0.386            | 0.062           | 0.944            |
| BUN (mg/dL)                     | 15.29            | ± 3.94  | 14.70        | ± 4.25  | 0.357            | 0.849           | 0.392            |
| CRE (mg/dL)                     | 0.75             | ± 0.17  | 0.76         | ± 0.15  | 0.438            | 0.021           | 0.485            |
| UA (mg/dL)                      | 5.11             | ± 1.04  | 5.21         | ± 0.95  | 0.411            | 0.544           | 0.480            |
| T-Cho (mg/dL)                   | 226.79           | ± 35.28 | 231.50       | ± 33.14 | 0.764            | 0.735           | 0.228            |
| HDL-Cho (mg/dL)                 | 69.43            | ± 20.86 | 70.07        | ± 20.38 | 0.743            | 0.243           | 0.710            |
| LDL-Cho (mg/dL)                 | 138.36           | ± 31.38 | 143.00       | ± 31.99 | 0.511            | 0.186           | 0.174            |
| TG (mg/dL)                      | 131.50           | ± 60.56 | 119.21       | ± 62.26 | 0.171            | 0.990           | 0.283            |
| HbA1c (%)                       | 5.50             | ± 0.21  | 5.53         | ± 0.28  | 0.916            | 0.194           | 0.377            |

Values are presented as the mean ± SD.

\**p* values were determined analysis of cross-over trials.<sup>11</sup>

2

3
